# Supplementary material for: Molecular quantification and differentiation of Candida species in biological specimens of patients with liver cirrhosis
Source: PubMed Central journal article supplement (PMC5999271; doi:10.1371/journal.pone.0197319), 2018-06-13
Supplement: pone.0197319.s001.pdf [file pone.0197319.s001.pdf]

**S1 Table. Baseline parameters of patients with liver cirrhosis compared with *Candida* DNA-positive and -negative duodenal samples.**

| Parameter                                                         | DNA-positive duodenal samples (n=44), median (range) | DNA-negative duodenal samples (n=10), median (range) | Level of significance (p) |
|-------------------------------------------------------------------|------------------------------------------------------|------------------------------------------------------|---------------------------|
| MELD score, median (range)                                        | 14 (6-40)                                            | 12 (5-20)                                            | 0.242                     |
| Age (years), median (range)                                       | 61 (29-84)                                           | 57 (32-65)                                           | 0.063                     |
| Albumin (g/l), median (range)                                     | 35.4 (21-46)                                         | 31.3 (29-47)                                         | 0.675                     |
| Bilirubin ( $\mu\text{mol/l}$ ), median (range)                   | 36 (7-286)                                           | 35.6 (10-82)                                         | 0.672                     |
| INR, median (range)                                               | 1.3 (1-2)                                            | 1.35 (1-2)                                           | 0.927                     |
| Hemoglobin (mmol/l), median (range)                               | 6.8 (5-9)                                            | 7 (5-8)                                              | 0.674                     |
| ALAT ( $\mu\text{kat/l}$ ), median (range)                        | 0.5 (0-3)                                            | 0.6 (0-2)                                            | 0.983                     |
| GGT ( $\mu\text{kat/l}$ ), median (range)                         | 1.6 (0-22)                                           | 1.6 (1-25)                                           | 0.749                     |
| Serum creatinine, ( $\mu\text{mol/l}$ ), median (range)           | 87 (29-591)                                          | 67 (48-114)                                          | 0.243                     |
| GFR (ml/min), median (range)                                      | 80.3 (8-150)                                         | 91.5 (44-123)                                        | 0.364                     |
| White blood cell count ( $\text{exp}9/\text{l}$ ), median (range) | 5.75 (2-13)                                          | 5.4 (2-11)                                           | 0.779                     |
| C-reactive protein (mg/dl), median (range)                        | 17.8 (1-104)                                         | 15.6 (1-44)                                          | 0.723                     |

GFR = glomerular filtration rate; INR = international normalized ratio; ALAT = Aspartat-Amino-Transferase; GGT = Gamma-glutamyltransferase.
