# Supplementary material for: Molecular quantification and differentiation of Candida species in biological specimens of patients with liver cirrhosis
Source: PubMed Central journal article supplement (PMC5999271; doi:10.1371/journal.pone.0197319), 2018-06-13
Supplement: pone.0197319.s002.pdf [file pone.0197319.s002.pdf]

**S2 Table. Correlation analysis using the Spearman Rho method between baseline parameters and Candida DNA quantification levels in duodenal samples.**

| Parameter                                                          | Correlation coefficient (r) | Level of significance (p) |
|--------------------------------------------------------------------|-----------------------------|---------------------------|
| MELD score; median (range)                                         | 0.266                       | 0.116                     |
| Age (years), median (range)                                        | 0.163                       | 0.298                     |
| Albumin (g/l), median (range)                                      | -0.258                      | 0.286                     |
| Bilirubin ( $\mu\text{mol/l}$ ), median (range)                    | 0.028                       | 0.867                     |
| INR, median (range)                                                | 0.073                       | 0.773                     |
| Hemoglobin, (mmol/l), median (range)                               | -0.217                      | 0.168                     |
| ALAT, ( $\mu\text{kat/l}$ ), median (range)                        | -0.220                      | 0.226                     |
| GGT, ( $\mu\text{kat/l}$ ); median (range)                         | -0.216                      | 0.234                     |
| Serum creatinine, ( $\mu\text{mol/l}$ ), median (range)            | 0.162                       | 0.304                     |
| GFR, (ml/min), median (range)                                      | -0.142                      | 0.368                     |
| White blood cell count ( $\text{exp}^9/\text{l}$ ), median (range) | -0.124                      | 0.438                     |
| C-reactive protein (mg/dl), median (range)                         | 0.209                       | 0.229                     |

GFR = glomerular filtration rate; INR = international normalized ratio; ALAT = Aspartat-Amino-Transferase; GGT = Gamma-glutamyltransferase.
