# Supplementary material for: Molecular quantification and differentiation of Candida species in biological specimens of patients with liver cirrhosis
Source: PubMed Central journal article supplement (PMC5999271; doi:10.1371/journal.pone.0197319), 2018-06-13
Supplement: pone.0197319.s003.pdf [file pone.0197319.s003.pdf]

**S3 Table. Association between drug therapy and the presence and quantification of Candida DNA in duodenal fluid.**

| Drug                             | Presence of fungal DNA (OR (IQR))      | Level of significance (p) | Median DNA quantification (range)                                                                                                                              | Level of significance (p) |
|----------------------------------|----------------------------------------|---------------------------|----------------------------------------------------------------------------------------------------------------------------------------------------------------|---------------------------|
| Antibiotic treatment (yes/no)    | 89.5% vs. 77.1%<br>2.5 (0.477–13.300)  | 0.277                     | <b>2.8x10<sup>6</sup></b><br><b>(2.2x10<sup>3</sup>–4.4x10<sup>8</sup>) vs.</b><br><b>3.2x10<sup>4</sup></b><br><b>(2.3x10<sup>2</sup>–6.3x10<sup>9</sup>)</b> | <b>0.001</b>              |
| Betablocker (yes/no)             | 80.0% vs. 84.2%<br>0.704 (0.302–5.889) | 0.737                     | 2.5x10 <sup>5</sup><br>(2.3x10 <sup>2</sup> –6.3x10 <sup>9</sup> )<br>vs. 1.3x10 <sup>6</sup><br>(8.8x10 <sup>2</sup> –4.1x10 <sup>9</sup> )                   | 0.390                     |
| Protone pump inhibitors (yes/no) | 89.3% vs. 73.1%<br>0.137 (0.74–1.428)  | 0.169                     | 5.0x10 <sup>5</sup><br>(2.3x10 <sup>2</sup> –4.1x10 <sup>9</sup> ) vs.<br>1.2x10 <sup>5</sup><br>(7.8x10 <sup>2</sup> –6.3x10 <sup>9</sup> )                   | 0.818                     |

OR = odds ratio; IQR = interquartile range
