# Supplementary material for: Molecular quantification and differentiation of Candida species in biological specimens of patients with liver cirrhosis
Source: PubMed Central journal article supplement (PMC5999271; doi:10.1371/journal.pone.0197319), 2018-06-13
Supplement: pone.0197319.s004.pdf [file pone.0197319.s004.pdf]

**S4 Table. *In silico* and measured T-RF in reference to *Candida* strains.**

| Strains                                      | Measured (in silico) T-RF [bp] |              |              |              |              |
|----------------------------------------------|--------------------------------|--------------|--------------|--------------|--------------|
|                                              | BfaI                           | BglI         | HaeIII       | Hpy188I      | SmaI         |
| <i>C. albicans</i> ATCC10231 <sup>a)</sup>   | 285.12 (285)                   | 494.39 (490) | 104.53 (108) | 342.23 (341) | 494.37 (490) |
| <i>C. tropicalis</i> ATCC13803 <sup>b)</sup> | 159.29 (160)                   | 492.91 (488) | 105.00 (108) | 120.03 (120) | 493.80 (488) |
| <i>C. kefyr</i> ZL17 <sup>c)</sup>           | 300.10 (298)                   | 508.68 (503) | 105.52 (108) | 112.17 (115) | 509.24 (503) |
| <i>C. glabrata</i> ATCC2001 <sup>d)</sup>    | 300.29 (298)                   | 101.89 (105) | 95.47 (99)   | 111.41 (114) | 139.77 (142) |
| <i>C. haemulonii</i> RV22                    | 278.24 (283)                   | 488.03 (488) | 488.09 (488) | 335.25 (339) | 487.83 (488) |
| <i>C. lusitanae</i> ZL24                     | 272.55 (276)                   | 482.35 (481) | 482.51 (481) | 329.31 (332) | 482.41 (481) |
| <i>C. parapsilosis</i> ATCC22019             | 160.17 (160)                   | 169.52 (170) | 104.68 (108) | 344.00 (341) | 494.82 (490) |
| <i>C. dubliniensis</i> RV30                  | 158.87 (160)                   | 495.08 (490) | 104.48 (108) | 343.09 (341) | 495.34 (490) |
| <i>C. guilliermondii</i> ZL10                | 299.42 (298)                   | 119.48 (122) | 105.38 (108) | 356.49 (354) | 509.54 (503) |
| <i>C. sphaerica</i> RV208                    | 299.35 (298)                   | 508.41 (503) | 508.68 (503) | 112.38 (115) | 508.75 (503) |
| <i>C. krusei</i> ATCC6258 <sup>e)</sup>      | 156.23 (157)                   | 488.96 (484) | 95.49 (99)   | 224.78 (224) | 488.56 (484) |
| <i>C. norvegensis</i> RV31                   | 155.57 (157)                   | 496.77 (492) | 95.49 (99)   | 344.98 (343) | 97.44 (102)  |

100% homology for following strains: a) *C. albicans* ATCC10231 and ATCC14053, ZL8b, ZL13, ZL18, ZL23; b) *C. tropicalis* ATCC13803 and RV101, ZL9, ZL22; c) *C. kefyr* ZL17 and ZL21; d) *C. glabrata* ATCC2001 and ZL12; e) *C. krusei* ATCC6258 and RV54, ZL11, ZL16, ZL20; f) *S. cerevisiae* RV20 and ZL14.
